# Supplementary material for: Cardiolipin Membranes Promote Cytochrome c Transformation of Polycyclic Aromatic Hydrocarbons and Their In Vivo Metabolites
Source: MDPI journal article supplement (doi:10.3390/molecules29051129), 2024-03-03

## Supplementary Material

Cardiolipin membranes promote cytochrome *c* transformation of polycyclic aromatic hydrocarbons and their *in vivo* metabolites

(Lopes *et al.*, *Molecules*, 2024)

### Table S.1

Polycyclic aromatic hydrocarbons studied in this work.

### Table S.2

Control assays of benzo[a]pyrene transformation in the absence of cytochrome *c* or in the absence of H<sub>2</sub>O<sub>2</sub>.

### Figure S.1

HPLC chromatograms of 2-hydroxynaphthalene and 1-hydroxypyrene transformation assays (24 h).

### Figure S.2

UV-Vis absorption spectrum of cytochrome *c* in the presence of naphthalene, acenaphthene, pyrene, benzo[a]anthracene, chrysene, benzo[a]pyrene, benzo[b]fluoranthene, 2-hydroxynaphthalene and 1-hydroxypyrene.

**Table S.1.** Polycyclic aromatic hydrocarbons studied in this work.

| Compound             | CAS number | Molecular weight (g mol <sup>-1</sup> ) | log K <sub>o/w</sub> * | Water solubility (mg mL <sup>-1</sup> ) ** | Ionization potential (eV) *** | Supplier, catalogue number and purity   |
|----------------------|------------|-----------------------------------------|------------------------|--------------------------------------------|-------------------------------|-----------------------------------------|
| Naphthalene          | 91-20-3    | 128.2                                   | 3.30                   | 1.19 × 10 <sup>-2</sup>                    | 8.14                          | Merk<br>820846, ≥ 99%                   |
| Acenaphthene         | 83-32-9    | 154.2                                   | 3.92                   | 3.80 × 10 <sup>-3</sup>                    | 7.70                          | Sigma-Aldrich<br>215376, 99%            |
| Anthracene           | 120-12-7   | 178.2                                   | 4.44                   | 3.20 × 10 <sup>-4</sup>                    | 7.42                          | Sigma-Aldrich<br>A89200, ≥ 97%          |
| Pyrene               | 129-00-0   | 202.25                                  | 4.88                   | 5.22 × 10 <sup>-5</sup>                    | 7.56                          | ACROS Organics<br>A0322434, 98%         |
| Benzo[a]anthracene   | 56-55-3    | 228.3                                   | 5.76                   | 8.46 × 10 <sup>-6</sup>                    | 7.47                          | Tokyo Chemical Industry<br>B0017, 98%   |
| Chrysene             | 218-01-9   | 228.3                                   | 5.81                   | 8.46 × 10 <sup>-6</sup>                    | 7.74                          | Tokyo Chemical Industry<br>C0339, > 98% |
| Benzo[a]pyrene       | 50-32-8    | 252.3                                   | 5.97                   | 1.38 × 10 <sup>-6</sup>                    | 7.17                          | Sigma-Aldrich<br>B1760, ≥ 96%           |
| Benzo[b]fluoranthene | 205-99-2   | 252.3                                   | 5.78                   | 1.38 × 10 <sup>-6</sup>                    | n/a                           | Tokyo Chemical Industry<br>B2982, ≥ 98% |
| 2-Hydroxynaphthalene | 135-19-3   | 144.2                                   | 2.70                   | 4.84 × 10 <sup>-2</sup>                    | n/a                           | Tokyo Chemical Industry<br>N0027, ≥ 99% |
| 1-Hydroxypyrene      | 5315-79-7  | 218.25                                  | 4.64                   | 2.11 × 10 <sup>-4</sup>                    | n/a                           | Tokyo Chemical Industry<br>H1435, ≥ 99% |

\* Logarithm of the octanol/water partition coefficient (log K<sub>o/w</sub>) computed by the XLOGP3 method and retrieved at the SwissADME web tool (<http://www.swissadme.ch/>).

\*\* Water solubilities calculated by FILTER-IT program and retrieved at the SwissADME web tool (<http://www.swissadme.ch/>).

\*\*\* First ionization potentials in Lee and Hites (1977) Mixed charge exchange-chemical ionization mass spectrometry of polycyclic aromatic hydrocarbons, *J. Am. Chem. Soc.* 99(6), 2008-2009, DOI: 10.1021/ja00448a070  
n/a – not available.

**Table S.2.** Control assays of benzo[a]pyrene (BaP) transformation in the absence of cytochrome *c* (Cc) or in the absence of H<sub>2</sub>O<sub>2</sub>. The effect of the presence of small unilamellar vesicles of phosphatidylcholine and cardiolipin (PC/CL, 4:1 molar ratio) was also tested. All assays were carried out with an initial concentration of BaP 1 mg/L in 20 mM phosphate buffer pH 7.0. Additional components were added to the assay media as indicated. After 24 h incubation at 37 °C, the media was extracted with hexane and analyzed by HPLC. The area of the peak of BaP in each tested condition was compared to control assays with only BaP in buffer, which were taken as 100%. The data presented are the Mean  $\pm$  SE from triplicate assays for each condition.

| Condition                                                        | H <sub>2</sub> O <sub>2</sub><br>( $\mu$ M) | Cytochrome <i>c</i><br>( $\mu$ M) | PC/CL vesicles<br>( $\mu$ M) | Area of BaP peak<br>(%) |
|------------------------------------------------------------------|---------------------------------------------|-----------------------------------|------------------------------|-------------------------|
| BaP only (control assays)                                        | 0                                           | 0                                 | 0                            | 100 $\pm$ 11            |
| Presence of H <sub>2</sub> O <sub>2</sub> , but<br>no Cc         | 100                                         | 0                                 | 0                            | 102 $\pm$ 18            |
| Copresence of H <sub>2</sub> O <sub>2</sub> and<br>CL, but no Cc | 100                                         | 0                                 | 200                          | 85 $\pm$ 15             |
| Copresence of CL and<br>Cc, but no H <sub>2</sub> O <sub>2</sub> | 0                                           | 1                                 | 200                          | 104 $\pm$ 15            |

**Figure S.1.** HPLC chromatograms of 2-hydroxynaphthalene (A) and 1-hydroxypyrene (B) transformation assays by cytochrome *c* (Cc), in the absence and in the presence of PC/CL small unilamellar vesicles. Chromatograms are shown for controls of each compound (1 mg/L) incubated in the absence of Cc, the compound with Cc 0.01 mg/mL (1 $\mu$ M), without and with PC/CL vesicles (200  $\mu$ M). All assay media included 100  $\mu$ M H<sub>2</sub>O<sub>2</sub> in 20 mM phosphate buffer pH 7.0, and were incubated for 24 h at 37 °C. The chromatograms are displaced in the vertical and horizontal axis for better observation. The chromatograms shown were obtained with a Zorbax Eclipse Plus C18 column and are representative results of triplicate assays for each reaction condition.

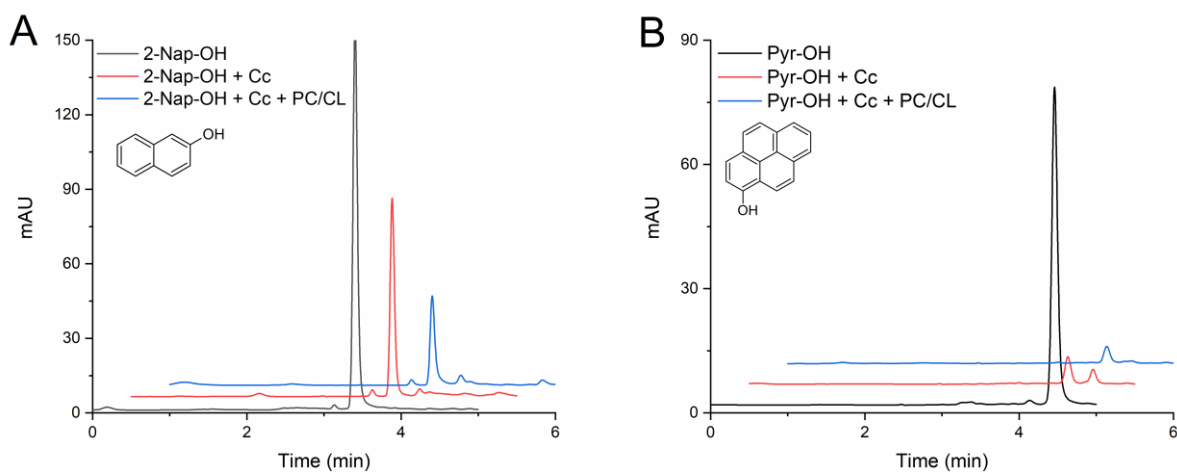

**Figure S.2.** UV-Vis absorption spectra of cytochrome *c* (Cc) in the presence of naphthalene (A), acenaphthene (B), pyrene (C), benzo[*a*]anthracene (D), chrysene (E), benzo[*a*]pyrene (F), benzo[*b*]fluoranthene (G), 2-hydroxynaphthalene (H) and 1-hydroxypyrene (I). The concentration of Cc was 5  $\mu$ M, in 20 mM phosphate buffer pH 7.0. After recording the Cc spectra, small volumes of the compound were added to the cuvette to reach equimolar concentration and the spectra were collected after 2 minutes incubation.

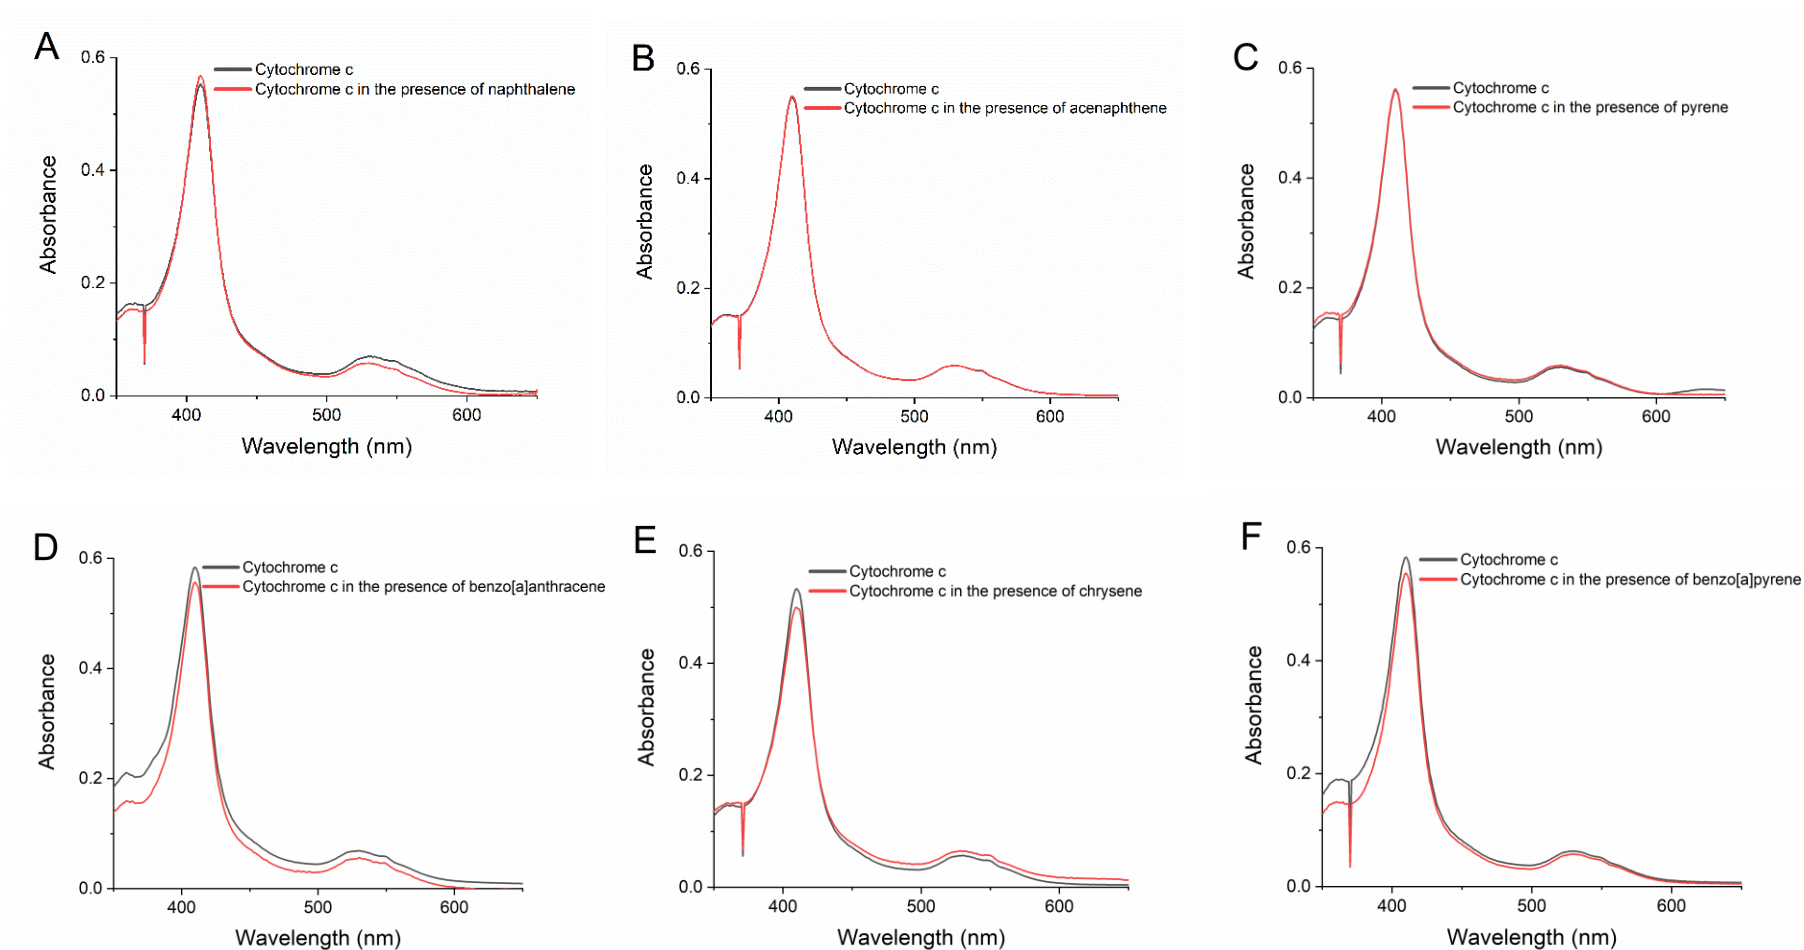

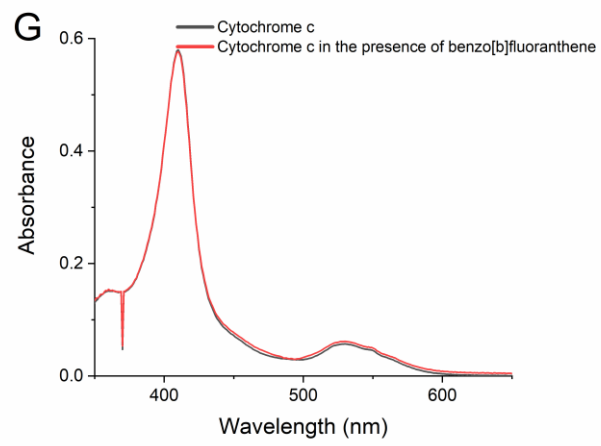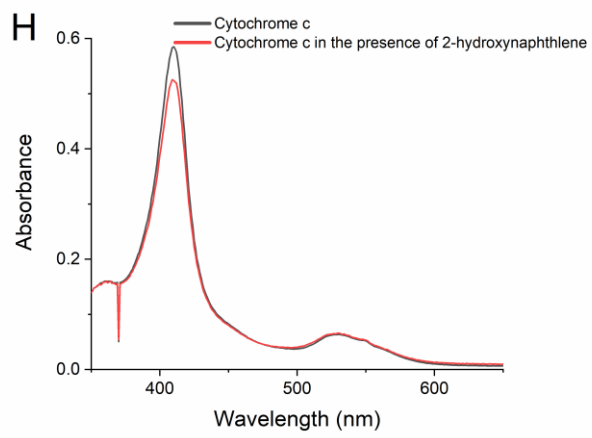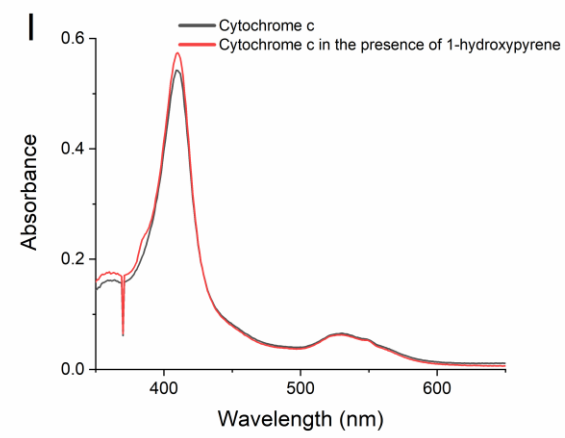

Supplement: s1 [file s1]
